# Supplementary material for: Cumin Prevents 17β-Estradiol-Associated Breast Cancer in ACI Rats
Source: MDPI journal article supplement (doi:10.3390/ijms22126194), 2021-06-08
Supplement: s1 [file s1]

# **Cumin Prevents 17 $\beta$ -Estradiol-Associated Breast Cancer in ACI Rats**

**Farrukh Aqil <sup>1,2</sup>, Jeyaprakash Jeyabalan <sup>1</sup>, Radha Munagala <sup>1,2</sup>, Iqbal Ahmad <sup>3</sup>, David J. Schultz <sup>4</sup> and Ramesh C. Gupta <sup>1,5,\*</sup>**

<sup>1</sup> James Graham Brown Cancer Center, University of Louisville, Louisville, KY 40202, USA; farrukh.aqil@louisville.edu (F.A.); jp3pbiotech@gmail.com (J.J.); radha.munagala@gmail.com (R.M.)

<sup>2</sup> Department of Medicine, University of Louisville, Louisville, KY 40202, USA

<sup>3</sup> Department of Ag Microbiology, Aligarh Muslim University, Aligarh 202002, India; iqbalahmad8@yahoo.co.in

<sup>4</sup> Department of Biology, University of Louisville, Louisville, KY 40208, USA; david.schultz@louisville.edu

<sup>5</sup> Department of Pharmacology and Toxicology, 580 S. Preston St, Rm 304E, Baxter II Research building, University of Louisville, Louisville, KY 40202, USA

\* Correspondence: rcgupta@louisville.edu; Tel.: +502-852-3684; Fax: +502-852-3842

**Supplementary Table S1.** Detailed formula of the AIN93M purified diet (Catalog # TD.94048; Harlan Laboratories, Madison, WI)

*Teklad Custom Research Diet Data Sheet*

**TD.94048     AIN-93M Purified Diet**

| <b>Formula</b>                  | <b>g/Kg</b> |
|---------------------------------|-------------|
| Casein                          | 140.0       |
| L-Cystine                       | 1.8         |
| Corn Starch                     | 465.692     |
| Maltodextrin                    | 155.0       |
| Sucrose                         | 100.0       |
| Soybean Oil                     | 40.0        |
| Cellulose                       | 50.0        |
| Mineral Mix, AIN-93M-MX (94049) | 35.0        |
| Vitamin Mix, AIN-93-VX (94047)  | 10.0        |
| Choline Bitartrate              | 2.5         |
| TBHQ, antioxidant               | 0.008       |

**Footnote**

Reference: J. Nutr. 123:1939-1951, 1993. Formulated for the maintenance of adult, non-reproducing rodents.

**Selected Nutrient Information<sup>1</sup>**

|                     | <b>% by weight</b> | <b>% kcal from</b> |
|---------------------|--------------------|--------------------|
| <b>Protein</b>      | 12.4               | 13.8               |
| <b>Carbohydrate</b> | 68.4               | 76.0               |
| <b>Fat</b>          | 4.1                | 10.2               |
| <b>Kcal/g</b>       | <b>3.6</b>         |                    |

<sup>1</sup> Values are calculated from ingredient analysis or manufacturer data

*Teklad Diets are designed & manufactured for research purposes only.*

## Supplementary Table S2 . GC-MS Analysis - Graphics Report

### Graphics Report

File : C:\HPCHEM\1\E25AMU1.D  
Operator : SVKL  
Acquired : 20 May 110 9:28 am using AcqMethod MANALI  
Sample Name: Cumin MeOH Ext. 15/04/10 FH 110  
Misc Info : 100-10-250- 3M-30-280-5M-MeIOH-HP5  
Vial Number: 1

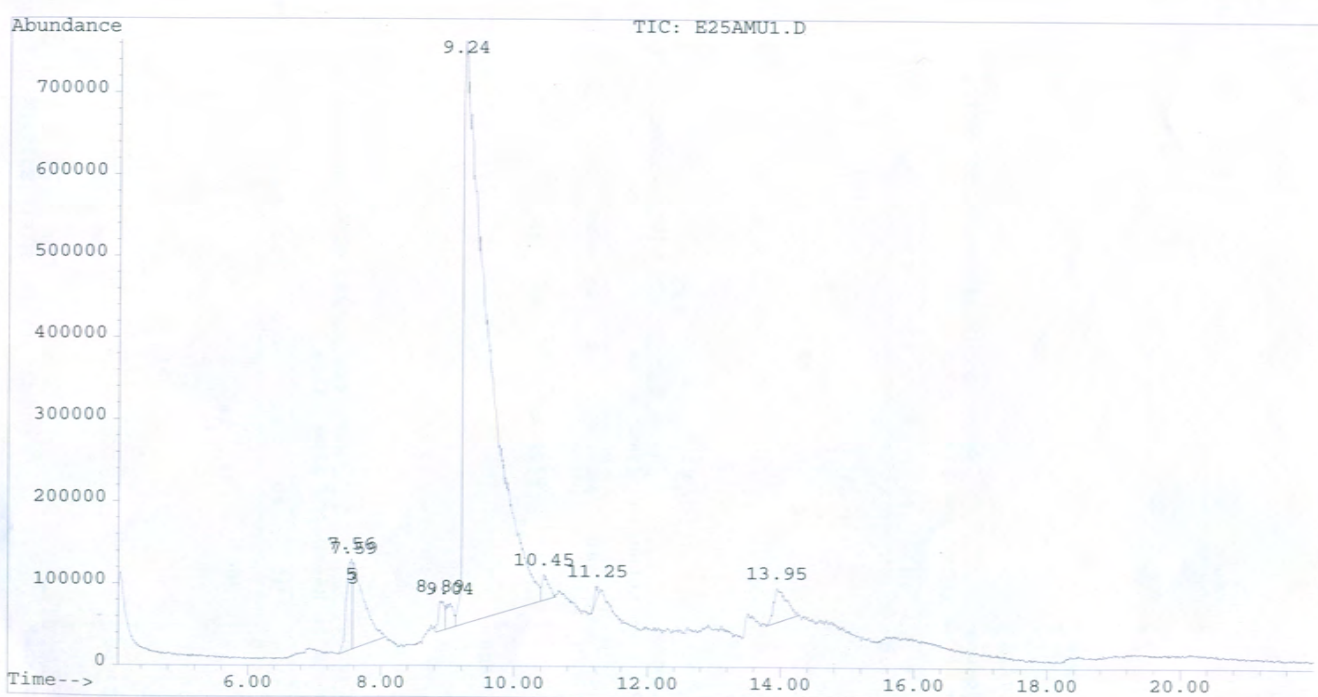

C:\HPCHEM\1\E25AMU1.D

Thu May 20 11:10:02 2010

Page 1 of 3

Peak 1 at Retention Time 7.55

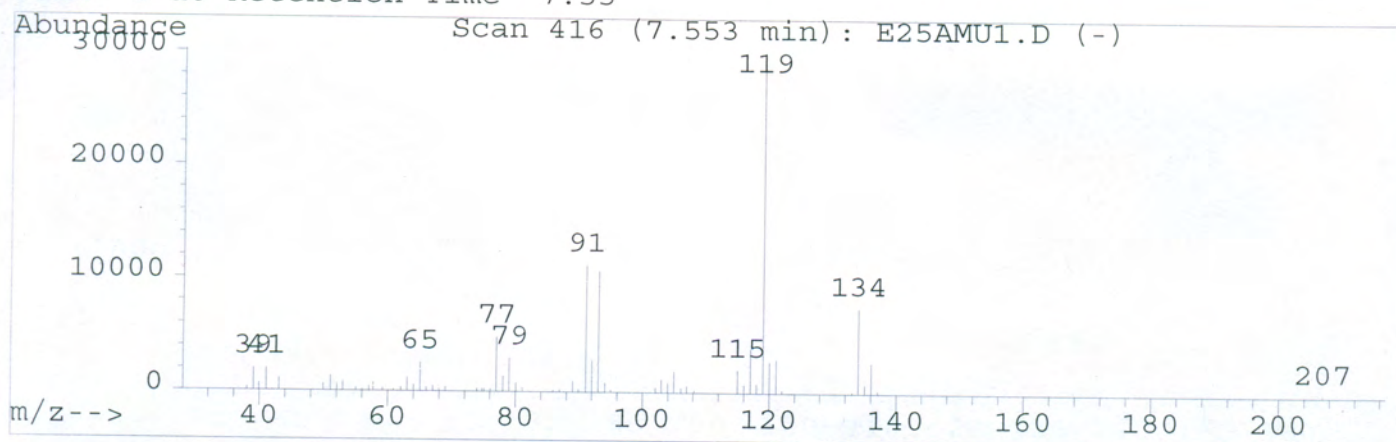

Peak 2 at Retention Time 7.59

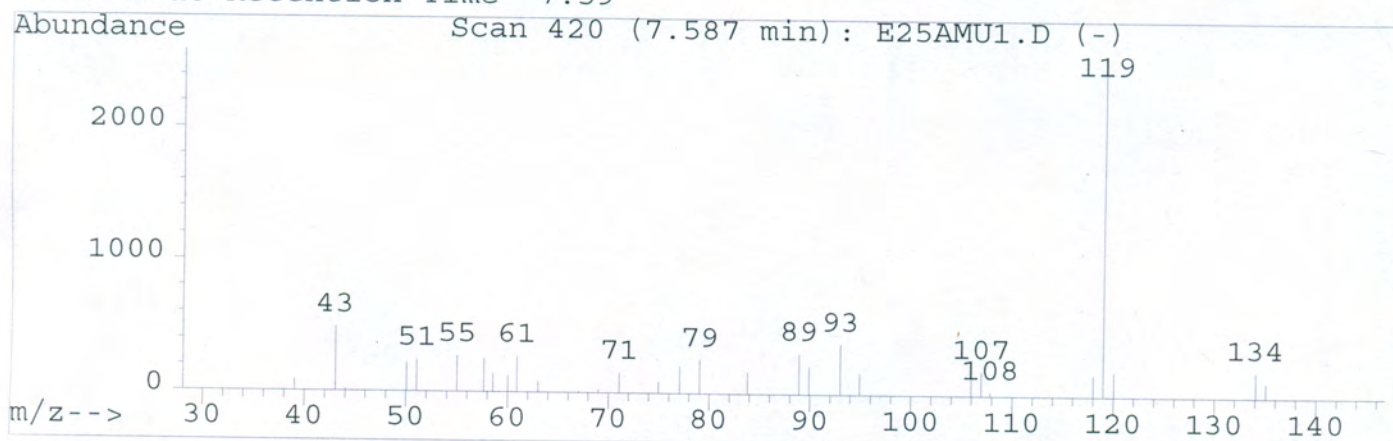

Peak 3 at Retention Time 8.89

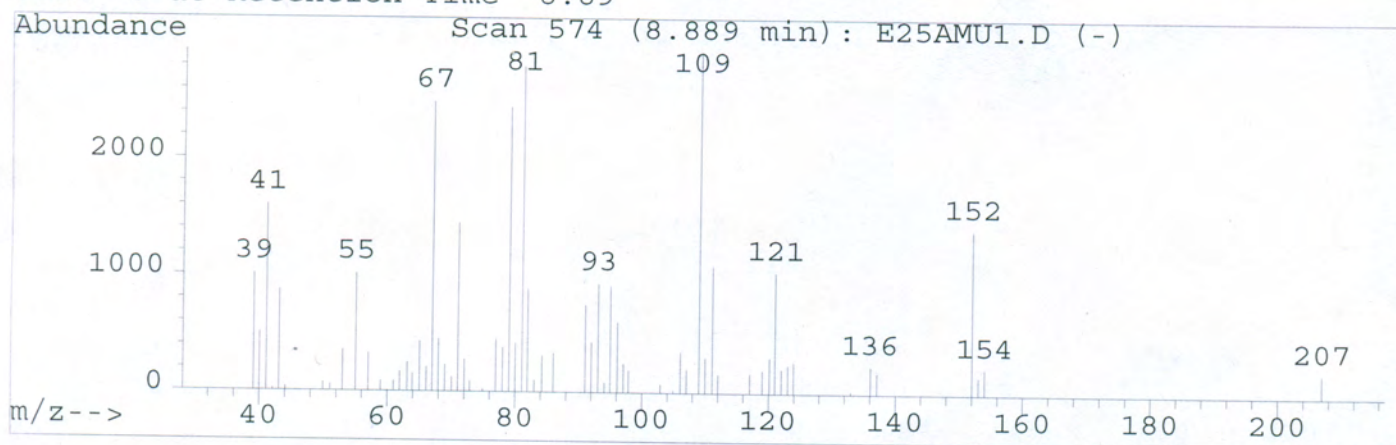

Peak 4 at Retention Time 9.04

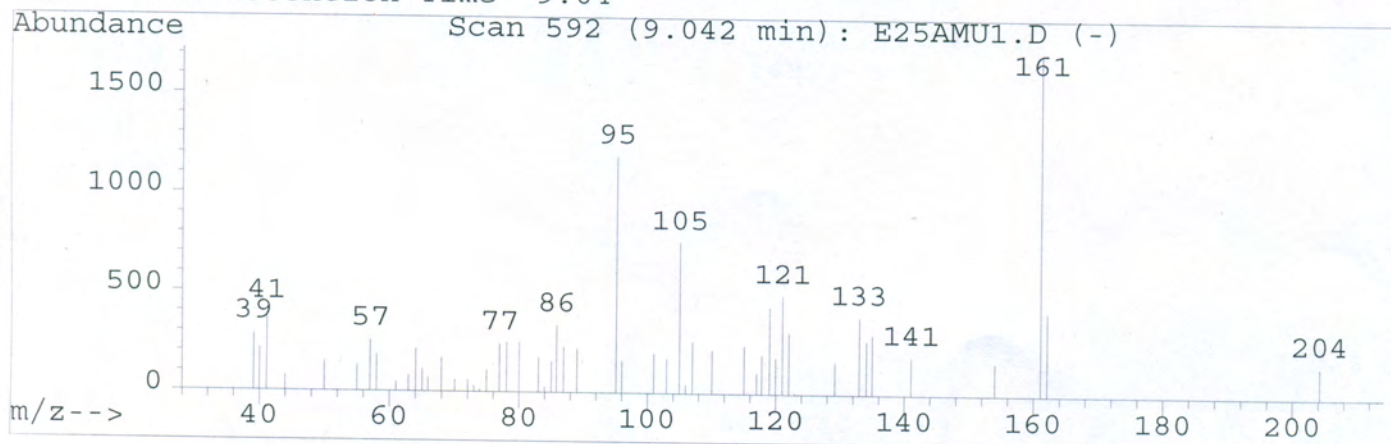



Peak 5 at Retention Time 9.24

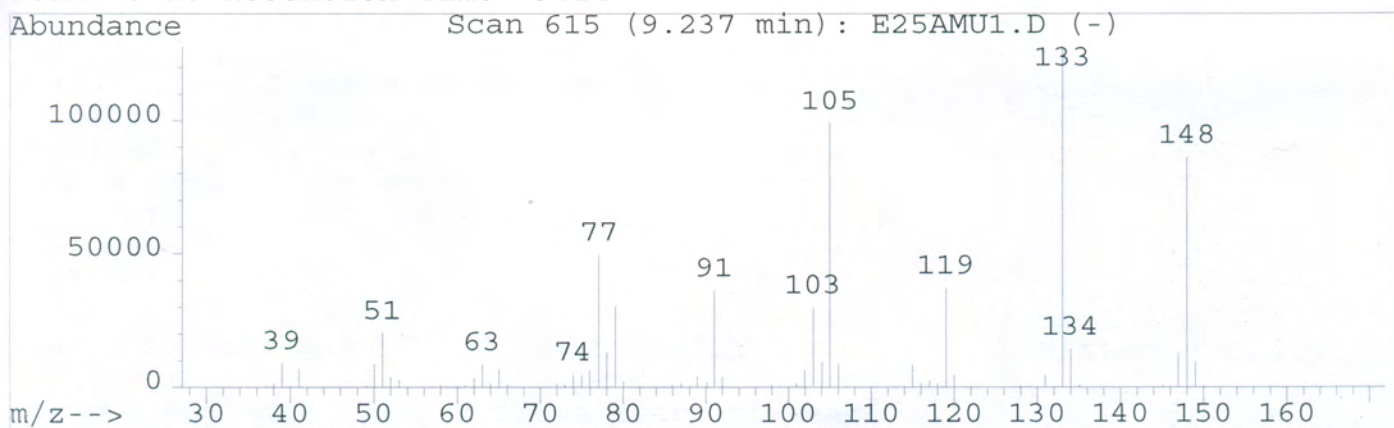

Peak 6 at Retention Time 10.44

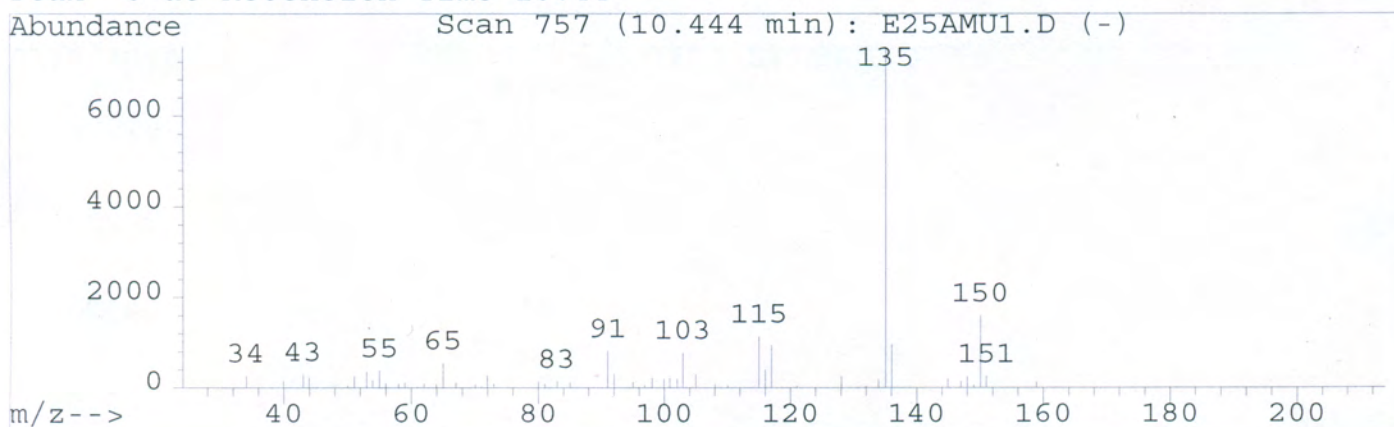

Peak 7 at Retention Time 11.25

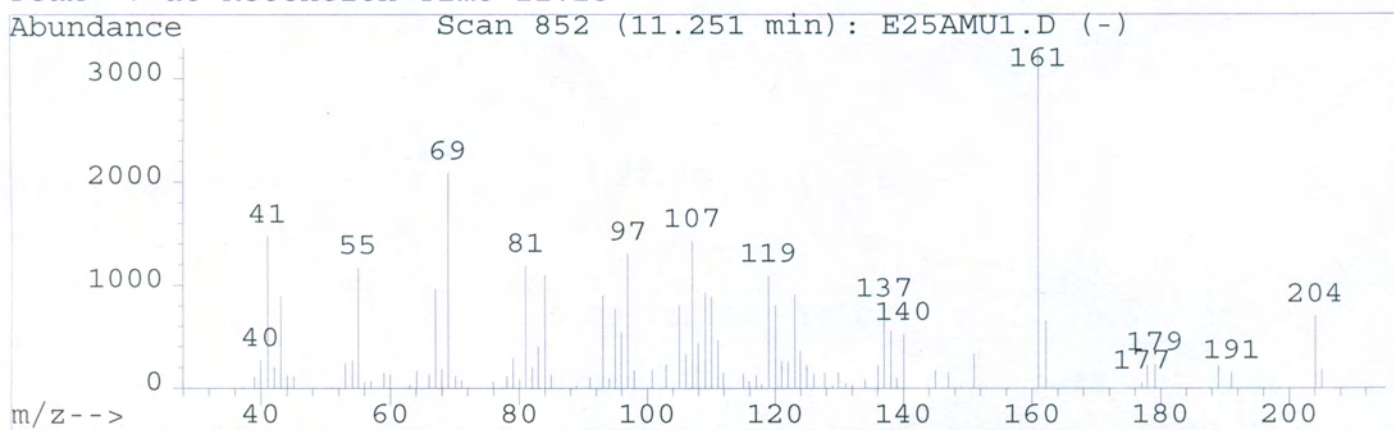

Peak 8 at Retention Time 13.95

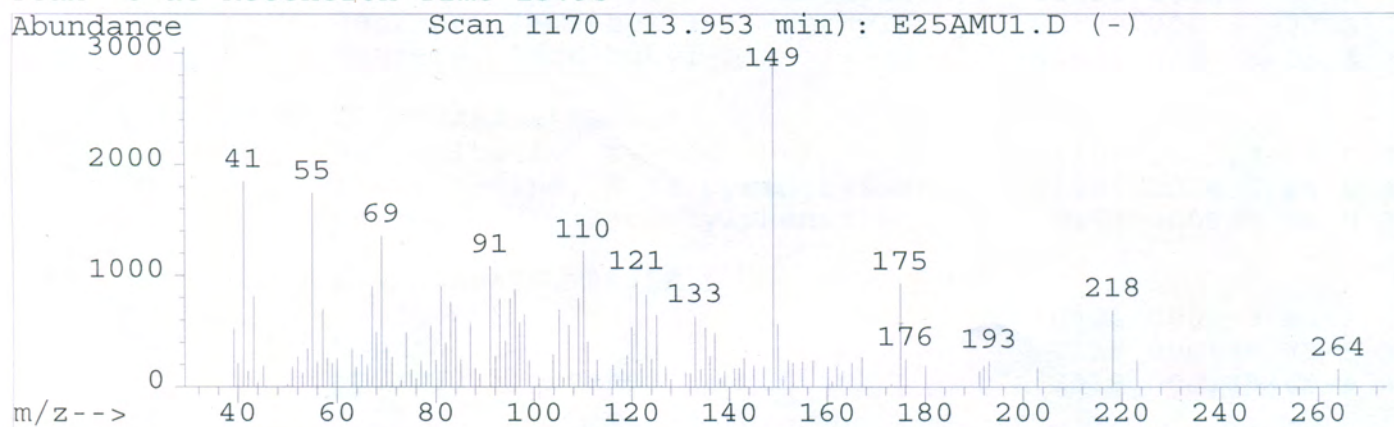

# Supplementary Table S3 . Library Research Report

## Summary Library Search Report

### Information from Data File:

File : C:\HPCHEM\1\E25AMU1.D  
 Operator : SVKL  
 Acquired : 20 May 110 9:28 am using AcqMethod MANALI  
 Sample Name: Cumin MeOH Ext. 15/04/10 FH 110  
 Misc Info : 100-10-250- 3M-30-280-5M-MeIOH-HP5  
 Vial Number: 1

Search Libraries: C:\DATABASE\nbs75k.1

Minimum Quality: 0

Unknown Spectrum: Apex minus start of peak

Integration Params: AutoIntegrate

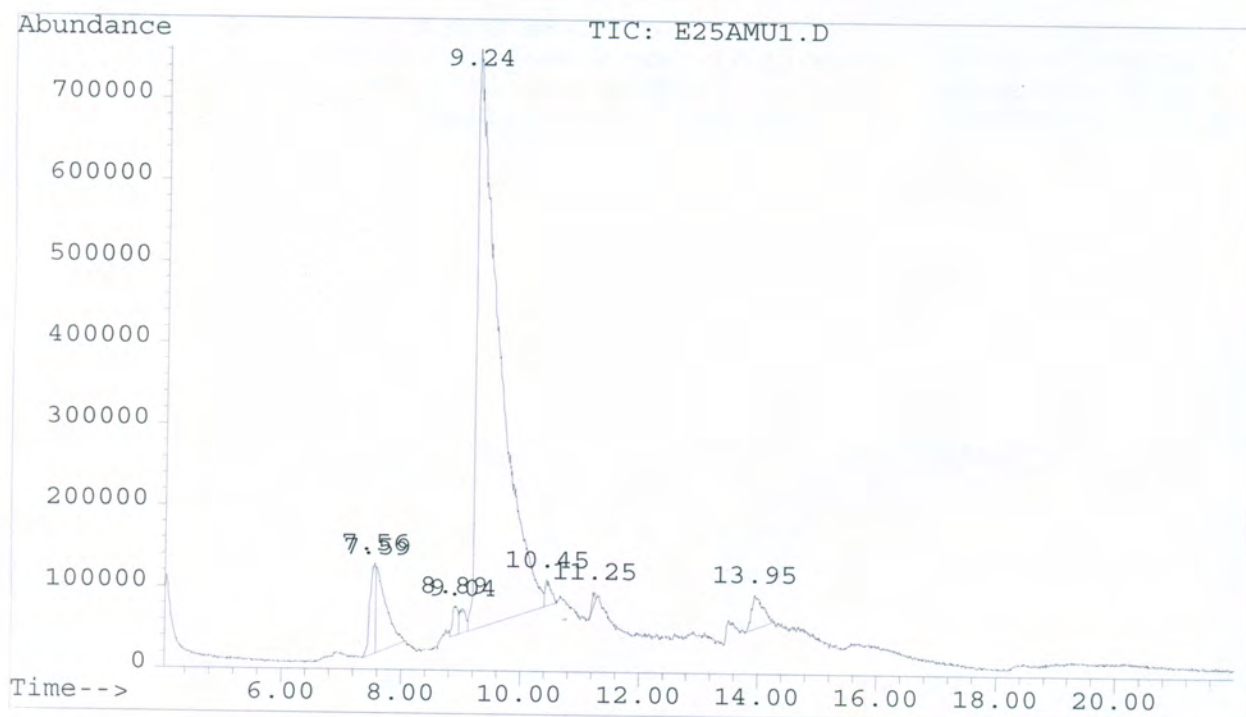

| PK# | RT   | Area% | Library/ID                         | Ref#  | CAS#        | Qual |
|-----|------|-------|------------------------------------|-------|-------------|------|
| 1   | 7.55 | 3.07  | C:\DATABASE\NBS75K.L               |       |             |      |
|     |      |       | Benzene, 1-methyl-4-(1-methylethyl | 65539 | 000099-87-6 | 92   |
|     |      |       | Benzene, 1-methyl-3-(1-methylethyl | 65579 | 000535-77-3 | 70   |
|     |      |       | Benzene, tert-butyl-               | 65529 | 000098-06-6 | 70   |
| 2   | 7.59 | 5.99  | C:\DATABASE\NBS75K.L               |       |             |      |
|     |      |       | Benzonitrile, 4-hydroxy-           | 64499 | 000767-00-0 | 47   |
|     |      |       | 1-Butanamine, N-(2-pyridinylmethyl | 12959 | 007032-24-8 | 40   |
|     |      |       | Ethanone, 1-(3-methylphenyl)-      | 6153  | 000585-74-0 | 38   |
| 3   | 8.89 | 1.04  | C:\DATABASE\NBS75K.L               |       |             |      |
|     |      |       | Pulegone                           | 10406 | 000089-82-7 | 46   |
|     |      |       | Mequinol                           | 4138  | 000150-76-5 | 30   |
|     |      |       | Spiro[2.5]octane                   | 2339  | 000185-65-9 | 30   |
| 4   | 9.04 | 1.03  | C:\DATABASE\NBS75K.L               |       |             |      |
|     |      |       | 1H-Cyclopropa[a]naphthalene, 1a,2, | 23897 | 017334-55-3 | 47   |
|     |      |       | 3a,7-Methano-3aH-cyclopentacyclooc | 23952 | 000469-92-1 | 43   |
|     |      |       | 2-Hexen-1-one, 1-(2-hydroxy-5-meth | 23838 | 051956-79-7 | 35   |



| Pk# | RT    | Area% | Library/ID                         | Ref#  | CAS#        | Qual |
|-----|-------|-------|------------------------------------|-------|-------------|------|
| 5   | 9.24  | 85.11 | C:\DATABASE\NBS75K.L               |       |             |      |
|     |       |       | Benzaldehyde, 4-(1-methylethyl)-   | 66596 | 000122-03-2 | 97   |
|     |       |       | Ethanone, 1-(2,4-dimethylphenyl)-  | 66595 | 000089-74-7 | 91   |
|     |       |       | Ethanone, 1-(2,5-dimethylphenyl)-  | 9319  | 002142-73-6 | 87   |
| 6   | 10.44 | 1.03  | C:\DATABASE\NBS75K.L               |       |             |      |
|     |       |       | Thymol                             | 66816 | 000089-83-8 | 74   |
|     |       |       | Phenol, 2-methyl-5-(1-methylethyl) | 66779 | 000499-75-2 | 72   |
|     |       |       | Phenol, p-tert-butyl-              | 9864  | 000098-54-4 | 58   |
| 7   | 11.25 | 0.24  | C:\DATABASE\NBS75K.L               |       |             |      |
|     |       |       | Carotol                            | 28216 | 000465-28-1 | 53   |
|     |       |       | Naphthalene, 1,2,3,4,4a,5,6,8a-oct | 23957 | 039029-41-9 | 50   |
|     |       |       | Germacrene D                       | 23911 | 023986-74-5 | 49   |
| 8   | 13.95 | 2.51  | C:\DATABASE\NBS75K.L               |       |             |      |
|     |       |       | Trichothec-9-en-8-one, 12,13-epoxy | 36571 | 002199-06-6 | 32   |
|     |       |       | Silane, chlorotripropyl-           | 20645 | 000995-25-5 | 27   |
|     |       |       | 2(1H)-Naphthalenone, octahydro-1,4 | 17896 | 022738-31-4 | 25   |

# Supplementary Table S4 . Area Percent Report

## Area Percent Report -- Sorted by Signal

### Information from Data File:

File : C:\HPCHEM\1\E25AMU1.D  
 Operator : SVKL  
 Acquired : 20 May 110 9:28 am using AcqMethod MANALI  
 Sample Name: Cumin MeOH Ext. 15/04/10 FH 110  
 Misc Info : 100-10-250- 3M-30-280-5M-MeIOH-HP5  
 Vial Number: 1  
 CurrentMeth: C:\HPCHEM\1\METHODS\MANALI.M

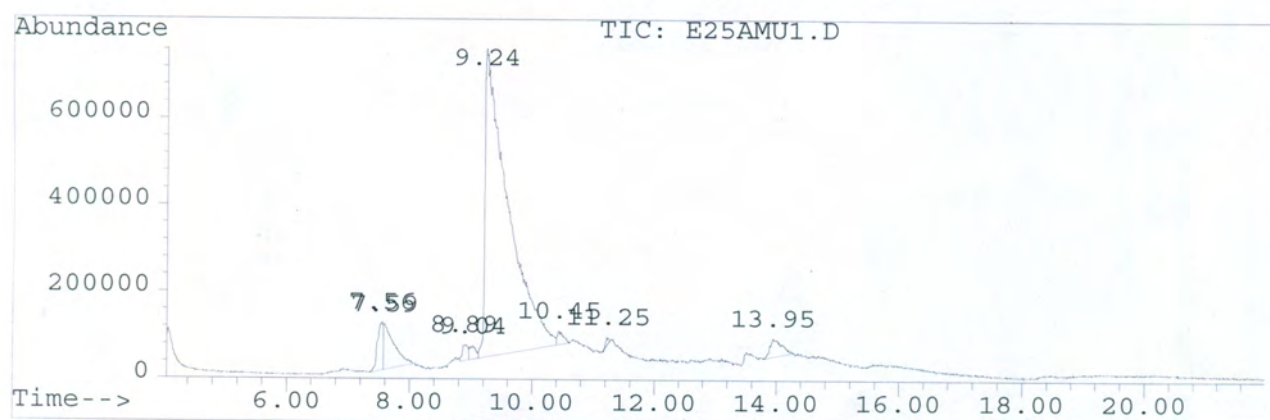

| Retention Time         | Area      | Area % | Ratio % | Type | Width |
|------------------------|-----------|--------|---------|------|-------|
| Total Ion Chromatogram |           |        |         |      |       |
| 7.556                  | 6641441   | 3.065  | 3.602   | PV   | 0.101 |
| 7.587                  | 12979705  | 5.991  | 7.039   | VV   | 0.207 |
| 8.891                  | 2244180   | 1.036  | 1.217   | VV   | 0.082 |
| 9.041                  | 2223002   | 1.026  | 1.206   | VV   | 0.125 |
| 9.242                  | 184390447 | 85.106 | 100.000 | VV   | 0.321 |
| 10.446                 | 2222522   | 1.026  | 1.205   | VV   | 0.106 |
| 11.253                 | 520542    | 0.240  | 0.282   | BV   | 0.055 |
| 13.951                 | 5437390   | 2.510  | 2.949   | PB   | 0.170 |



**Supplementary Table S5.** Allometric dose calculations based on body surface area

Average feed intake/rat/day = 10 g; Cumin extract dose/rat/day @1% (w/w) supplement = 100 mg; Average body weight of female ACI rat = 200 g (0.2 kg); Intake of dried extract diet (mg/kg body weight) @ 1% = 100 mg/0.2 kg = 500 mg

$$\begin{aligned}\text{Human Eq. Dose (mg/kg)} &= \text{Animal dose (mg/kg)} \times \frac{\text{Animal Km (6 for rats)}}{\text{Human Km (37 for 60 kg adult)}} \\ &= 500 \times \frac{6}{37} \\ &= 81 \text{ mg (equivalent of 0.63 g of cumin seeds)}\end{aligned}$$

where *Km factor* is the body weight (kg) divided by body surface area (m<sup>2</sup>)

**Reference:** Reagan-Shaw S, Nihal M, Ahmad N (2008) Dose translation from animal to human studies revisited. *FASEB J* 22:659–661
